# Supplementary material for: Predictive Value of 18F-FDG PET/CT Using Machine Learning for Pathological Response to Neoadjuvant Concurrent Chemoradiotherapy in Patients with Stage III Non-Small Cell Lung Cancer
Source: MDPI journal article supplement (doi:10.3390/cancers14081987), 2022-04-14
Supplement: s1 [file s1]

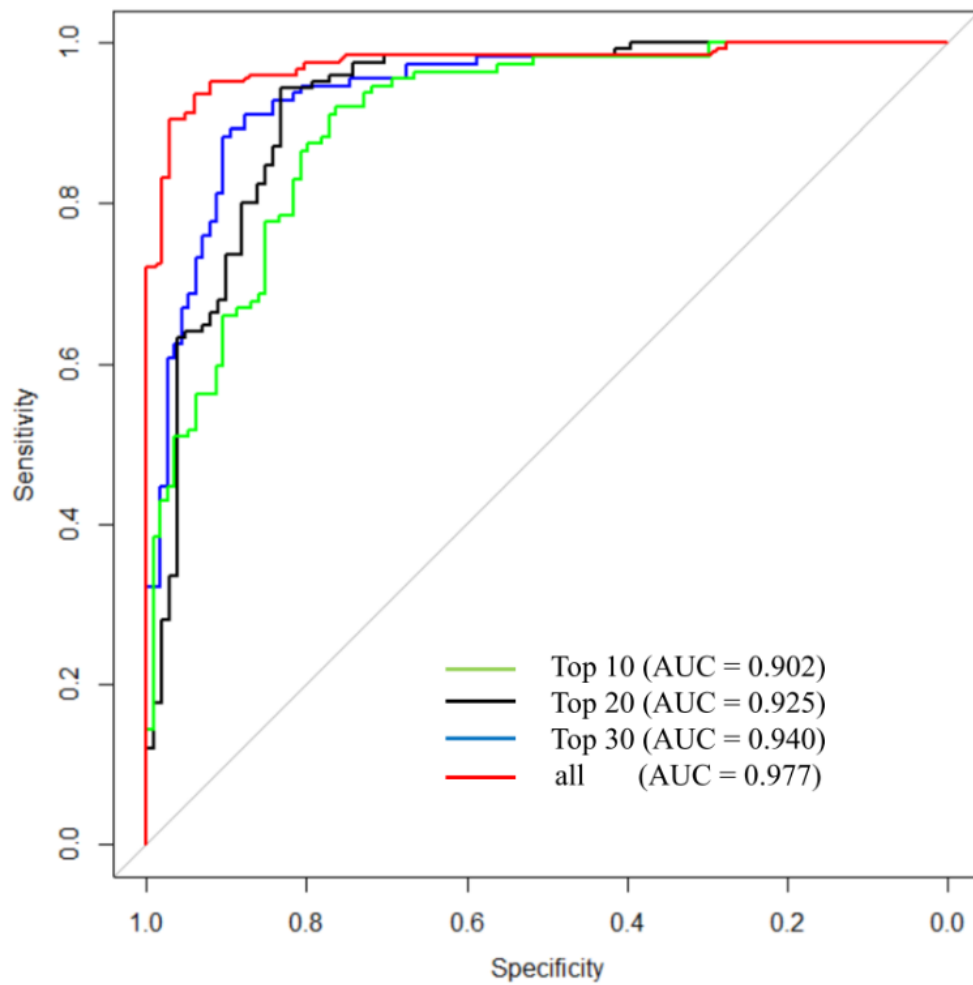

**Figure S1.** Comparison of ROC curves from random forest according to ranking-based feature selection.
