# Supplementary material for: Predictive Value of 18F-FDG PET/CT Using Machine Learning for Pathological Response to Neoadjuvant Concurrent Chemoradiotherapy in Patients with Stage III Non-Small Cell Lung Cancer
Source: MDPI journal article supplement (doi:10.3390/cancers14081987), 2022-04-14
Supplement: s1 [file s1]

**Table S2.** Predictive performance of random forest according to ranking-based feature selection.

| Features | AUC                  | ACC                    | F1                     | Precision              | Recall |
|----------|----------------------|------------------------|------------------------|------------------------|--------|
| Top 10   | 0.902 <sup>*,†</sup> | 0.823 <sup>*,†,‡</sup> | 0.837 <sup>*,†,‡</sup> | 0.769 <sup>*,†,‡</sup> | 0.920  |
| Top 20   | 0.925 <sup>‡</sup>   | 0.867 <sup>*,§</sup>   | 0.876 <sup>*,§</sup>   | 0.815 <sup>*,§,¶</sup> | 0.940  |
| Top 30   | 0.940 <sup>*</sup>   | 0.881 <sup>†¶</sup>    | 0.897 <sup>†¶</sup>    | 0.855 <sup>†§,#</sup>  | 0.942  |
| All      | 0.977 <sup>†,‡</sup> | 0.934 <sup>†§¶</sup>   | 0.940 <sup>†§¶</sup>   | 0.937 <sup>‡,#</sup>   | 0.944  |

AUC, area under curve; ACC, accuracy; \*, †, ‡, §, ¶, #,  $p < 0.05$ .
