# Supplementary material for: Predictive Value of 18F-FDG PET/CT Using Machine Learning for Pathological Response to Neoadjuvant Concurrent Chemoradiotherapy in Patients with Stage III Non-Small Cell Lung Cancer
Source: MDPI journal article supplement (doi:10.3390/cancers14081987), 2022-04-14
Supplement: s1 [file s1]

**Table S1.** List of quantitative PET-based radiomic features from CGITA.

| Matrix                                     | Index                                                                                                                                                                                                                                                                                                            |
|--------------------------------------------|------------------------------------------------------------------------------------------------------------------------------------------------------------------------------------------------------------------------------------------------------------------------------------------------------------------|
| Cooccurrence matrix                        | Second angular moment, contrast, entropy, homogeneity, dissimilarity, inverse difference moment                                                                                                                                                                                                                  |
| Voxel-alignment matrix                     | Short-run emphasis, long-run emphasis, intensity variability, run-length variability, run percentage, low-intensity run emphasis, high-intensity run emphasis, low-intensity short-run emphasis, high-intensity short-run emphasis, low-intensity long-run emphasis, high-intensity long-run emphasis            |
| Neighborhood intensity difference matrix   | Coarseness, contrast, busyness, complexity, strength                                                                                                                                                                                                                                                             |
| Intensity size-zone matrix                 | Short-zone emphasis, large-zone emphasis, intensity variability, size-zone variability, zone percentage, low-intensity zone emphasis, high-intensity zone emphasis, low-intensity short-zone emphasis, high-intensity short-zone emphasis, low-intensity large-zone emphasis, high-intensity large-zone emphasis |
| Normalized cooccurrence matrix             | Second angular moment, contrast, entropy, homogeneity, inverse difference moment, dissimilarity, correlation                                                                                                                                                                                                     |
| Voxel statistics                           | Minimum SUV, maximum SUV, mean SUV, SUV variance, SUV SD, SUV skewness, SUV kurtosis, SUV skewness (bias corrected), SUV kurtosis (bias corrected), TLG, tumor volume, entropy, $SUL_{peak}$                                                                                                                     |
| Texture spectrum                           | Max spectrum, black-white symmetry                                                                                                                                                                                                                                                                               |
| Texture feature coding                     | Coarseness, homogeneity, mean convergence                                                                                                                                                                                                                                                                        |
| Texture feature coding cooccurrence matrix | Second angular moment, contrast, entropy, homogeneity, intensity, inverse difference moment, correlation, variance, code similarity                                                                                                                                                                              |
| Neighborhood gray-level dependence         | Small-number emphasis, large-number emphasis, number nonuniformity, second moment, entropy                                                                                                                                                                                                                       |

CGITA, Chang-Gung Image Texture Analysis toolbox; SUV, standard uptake value; SD, standard deviation; TLG, total lesion glycolysis; SUL, SUV normalized to lean body mass.
